# Supplementary material
Source: PubMed Central journal article supplement (PMC1895440)
Supplement: blood_blood-2006-04-020271_1.pdf [file blood_blood-2006-04-020271_1.pdf]

## Mutagenesis

K703R

5' GGA ACTGGATATATCAGGACTGAGTTGATTTCTGTGTCTG 3'

5' CAGACACAGAAATCAACTCAGTCCTGATATATCCAGTTCC 3'

E705A

5' GGA TAC ATC AAG ACT GCG TTG ATT TCT GTG TCT GA 3'

5' TCA GAC ACA GAA ATC AAC GCA GTC TTG ATC TAT CC 3'

## Oligonucleotide Pull-down (GAS element in bold)

Biotin-5' ATC **CTT TCC GGG AAG** TCT GAT CCT **TTC CGG GAA** GTC TG 3'

5' CAG **ACT TCC CGG AAA** GGA TCA GAC **TTC CCG GAA** AGG AT 3'

## Q-PCR

$\beta$ -actin forward - 5' GCT CCT CCT GAG CGC AAG T 3'

reverse - 5' TCG TCA TAC TCC TGC TTG CTG AT 3'

IRF-1 forward - 5' TAA CTC CAG CAC TGT CAC CGT GTG 3'

reverse - 5' TCC CTT CCT CAT CCT CGT CTG TTG 3'

TAP1 forward - 5' CCA GAA GTT CAG GCA GAA GTT GGA A 3'

reverse - 5' TTC AGC AGC ATT CCC GAG ACA CT 3'

GBP1 forward - 5' CAG CAT AGG AAC CAT CAA CCA GCA G 3'

reverse - 5' AGC CCA CAA AGT TAG CGG AAT CG 3'

Mig forward - 5' GGA GAC TTC TGA GGC TCA CG 3'

reverse - 5' TGA AAT CCC ATC CTC TCG AAA GC 3'
